# Supplementary material for: Theoretical study on the relationship between the molecular structures and optoelectronic properties of aromatic-fluorinated sumanene derivatives
Source: Royal Society of Chemistry journal article supplement (doi:10.1039/d3nj00540b), 2023-01-01
Supplement: d3nj00540b1.pdf [file d3nj00540b1.pdf]

## Theoretical study on the relationship between the molecular structures and optoelectronic properties of aromatic-fluorinated sumanene derivatives

Xi Chen,<sup>a</sup> Xin-Peng Liu,<sup>a</sup> Xin Pu,<sup>ab</sup> Simeng Gao,<sup>\*a</sup> Wei Wei,<sup>b</sup> and Fu-Quan Bai<sup>\*bc</sup>

<sup>a</sup> College of Chemistry and Chemical Engineering, Northeast Petroleum University, Daqing, 163318, China. E-mail: Gaosm@nepu.edu.cn

<sup>b</sup> Institute of Theoretical Chemistry, Jilin University, Changchun 130012, China. E-mail: baifq@jlu.edu.cn

<sup>c</sup> Beijing National Laboratory for Molecular Sciences, Beijing, China.

**Table S1. Main geometric parameters of sumanene and its aromatic-fluorinated derivatives at the ground state. (Unit: Å)**

| Molecules | rimC-C (r1/r2/r3) |       |       | vertexC-C (v1/v2/.../v6) |       |       |       |       |       | rim-quatC=C (rq1/rq2/.../rq6) |       |       |       |       |       |
|-----------|-------------------|-------|-------|--------------------------|-------|-------|-------|-------|-------|-------------------------------|-------|-------|-------|-------|-------|
| 0         | 1.431             | 1.431 | 1.431 | 1.555                    | 1.555 | 1.555 | 1.555 | 1.555 | 1.555 | 1.400                         | 1.400 | 1.400 | 1.400 | 1.400 | 1.400 |
| 1         | 1.425             | 1.431 | 1.431 | 1.554                    | 1.555 | 1.555 | 1.555 | 1.555 | 1.550 | 1.393                         | 1.398 | 1.399 | 1.400 | 1.400 | 1.400 |
| 2         | 1.433             | 1.431 | 1.431 | 1.549                    | 1.555 | 1.555 | 1.555 | 1.555 | 1.549 | 1.390                         | 1.390 | 1.399 | 1.399 | 1.399 | 1.399 |
| 3         | 1.425             | 1.425 | 1.431 | 1.554                    | 1.550 | 1.554 | 1.555 | 1.555 | 1.549 | 1.393                         | 1.398 | 1.393 | 1.398 | 1.399 | 1.399 |
| 4         | 1.425             | 1.425 | 1.431 | 1.554                    | 1.554 | 1.549 | 1.555 | 1.555 | 1.549 | 1.393                         | 1.398 | 1.398 | 1.393 | 1.400 | 1.400 |
| 5         | 1.425             | 1.431 | 1.425 | 1.554                    | 1.555 | 1.555 | 1.554 | 1.549 | 1.549 | 1.393                         | 1.398 | 1.399 | 1.399 | 1.398 | 1.393 |
| 6         | 1.433             | 1.425 | 1.431 | 1.549                    | 1.549 | 1.554 | 1.555 | 1.555 | 1.549 | 1.390                         | 1.390 | 1.393 | 1.398 | 1.399 | 1.399 |
| 7         | 1.433             | 1.425 | 1.431 | 1.549                    | 1.554 | 1.549 | 1.555 | 1.555 | 1.549 | 1.390                         | 1.390 | 1.398 | 1.393 | 1.399 | 1.399 |
| 8         | 1.425             | 1.425 | 1.425 | 1.554                    | 1.549 | 1.554 | 1.549 | 1.554 | 1.549 | 1.393                         | 1.398 | 1.393 | 1.398 | 1.393 | 1.398 |
| 9         | 1.425             | 1.425 | 1.425 | 1.554                    | 1.549 | 1.554 | 1.554 | 1.549 | 1.549 | 1.393                         | 1.398 | 1.393 | 1.398 | 1.398 | 1.393 |
| 10        | 1.433             | 1.433 | 1.431 | 1.549                    | 1.549 | 1.549 | 1.555 | 1.555 | 1.549 | 1.390                         | 1.390 | 1.390 | 1.390 | 1.399 | 1.399 |
| 11        | 1.433             | 1.425 | 1.425 | 1.549                    | 1.549 | 1.554 | 1.549 | 1.554 | 1.549 | 1.390                         | 1.390 | 1.393 | 1.397 | 1.393 | 1.397 |
| 12        | 1.433             | 1.425 | 1.425 | 1.549                    | 1.549 | 1.554 | 1.554 | 1.549 | 1.549 | 1.390                         | 1.390 | 1.393 | 1.397 | 1.397 | 1.393 |
| 13        | 1.433             | 1.425 | 1.425 | 1.549                    | 1.554 | 1.549 | 1.549 | 1.554 | 1.549 | 1.390                         | 1.390 | 1.397 | 1.393 | 1.393 | 1.397 |
| 14        | 1.433             | 1.433 | 1.425 | 1.549                    | 1.549 | 1.549 | 1.549 | 1.554 | 1.549 | 1.390                         | 1.390 | 1.390 | 1.390 | 1.393 | 1.397 |
| 15        | 1.433             | 1.433 | 1.433 | 1.549                    | 1.549 | 1.549 | 1.549 | 1.549 | 1.549 | 1.390                         | 1.390 | 1.390 | 1.390 | 1.390 | 1.390 |

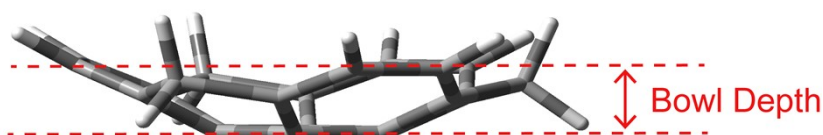

**Figure S1. Graphical representation of the molecular bowl depth which is the average value of the vertical distance of the rim carbons and the hub carbons of the sumanene skeleton. (take sumanene as an example.)**

**Table S2. HOMO, LUMO energy levels, HOMO-LUMO energy gap ( $\Delta H-L$ ) and the lowest excitation energy ( $E_g$ ) of sumanene and its aromatic-fluorinated derivatives. (Units: eV)**

| Molecules | HOMO  | LUMO  | $\Delta H-L$ | $E_g$ |
|-----------|-------|-------|--------------|-------|
| 0         | -5.48 | -0.73 | 4.75         | 3.86  |
| 1         | -5.51 | -0.92 | 4.60         | 3.83  |
| 2         | -5.60 | -0.98 | 4.62         | 3.83  |
| 3         | -5.60 | -1.02 | 4.59         | 3.83  |
| 4         | -5.54 | -1.03 | 4.52         | 3.80  |
| 5         | -5.59 | -1.10 | 4.49         | 3.79  |
| 6         | -5.73 | -1.14 | 4.59         | 3.81  |
| 7         | -5.64 | -1.11 | 4.53         | 3.80  |
| 8         | -5.76 | -1.10 | 4.66         | 3.83  |
| 9         | -5.64 | -1.20 | 4.44         | 3.77  |
| 10        | -5.77 | -1.21 | 4.56         | 3.81  |
| 11        | -5.77 | -1.24 | 4.52         | 3.80  |
| 12        | -5.75 | -1.26 | 4.50         | 3.79  |
| 13        | -5.71 | -1.29 | 4.42         | 3.75  |
| 14        | -5.84 | -1.34 | 4.50         | 3.78  |
| 15        | -5.98 | -1.43 | 4.55         | 3.76  |

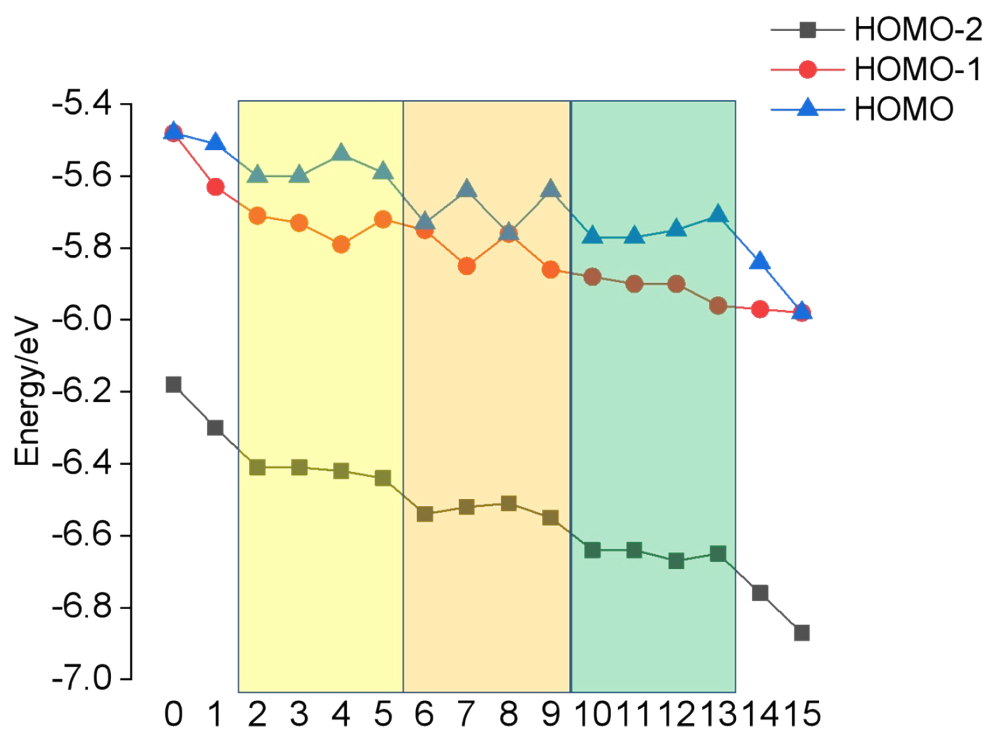**Figure S2. HOMO, HOMO-1 and HOMO-2 energy levels of sumanene and its aromatic-fluorinated derivatives. The values of disubstituted, trisubstituted and tetrasubstituted sumanene derivatives were painted on yellow, orange and green backgrounds respectively.**

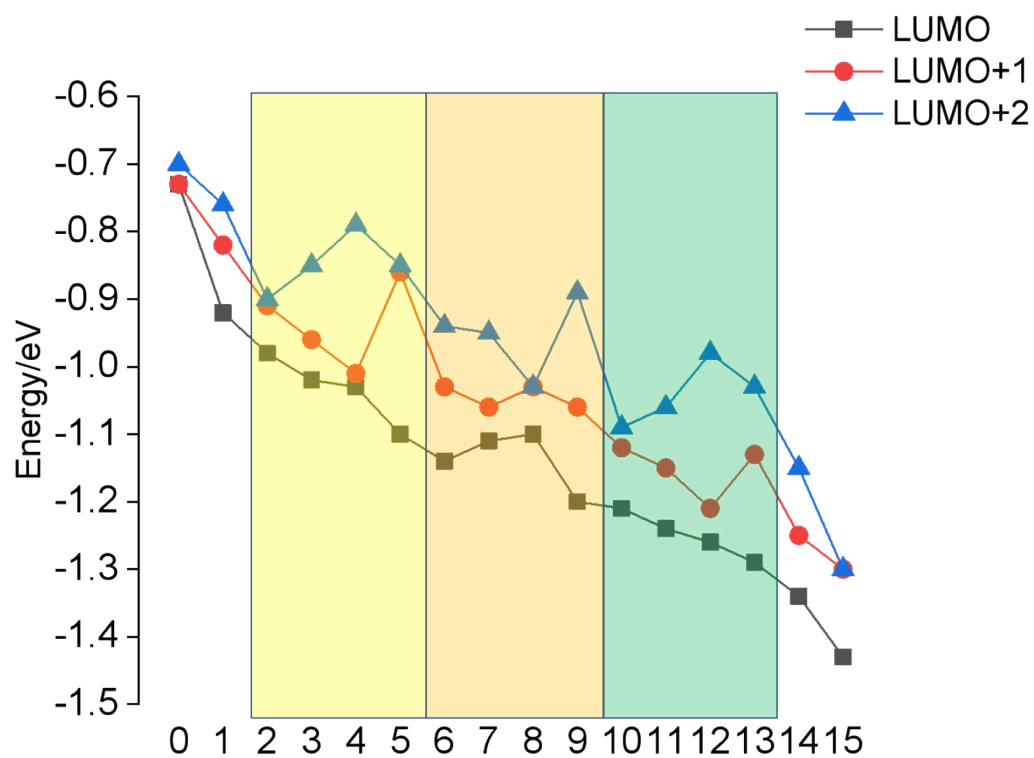

**Figure S3.** LUMO, LUMO+1 and LUMO+2 energy levels of sumanene and its aromatic-fluorinated derivatives. The values of disubstituted, trisubstituted and tetrasubstituted sumanene derivatives were painted on yellow, orange and green backgrounds respectively.

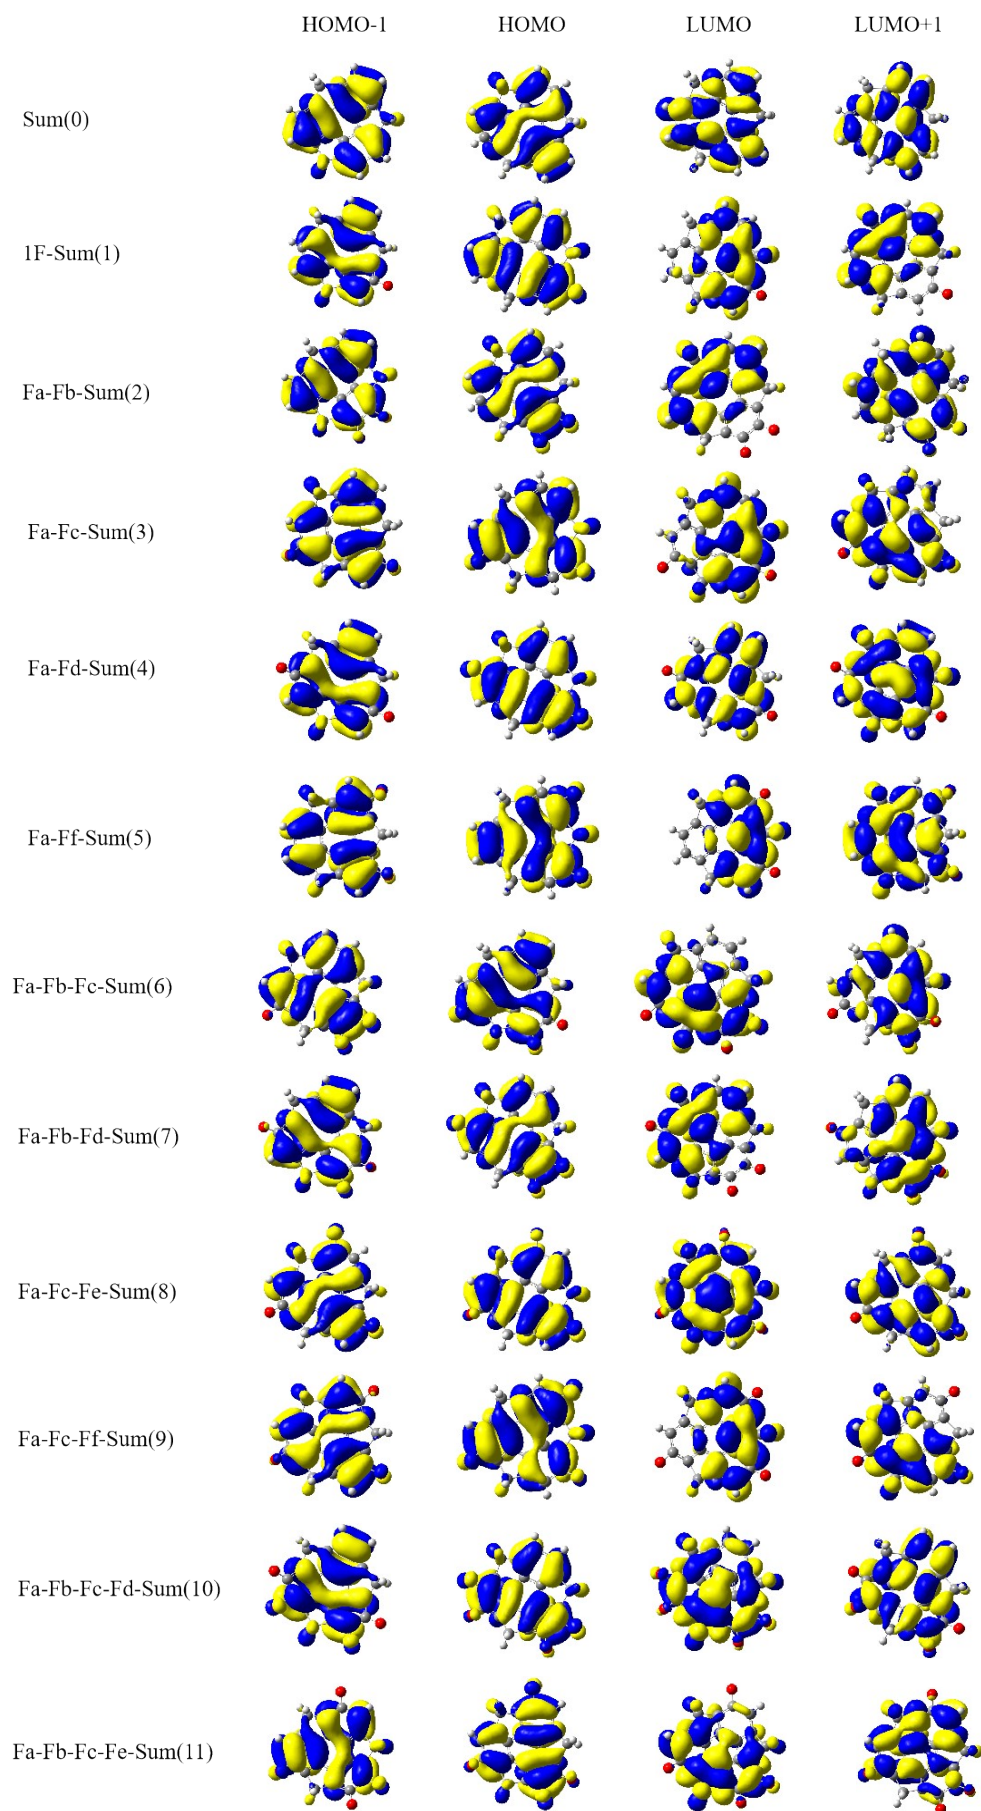

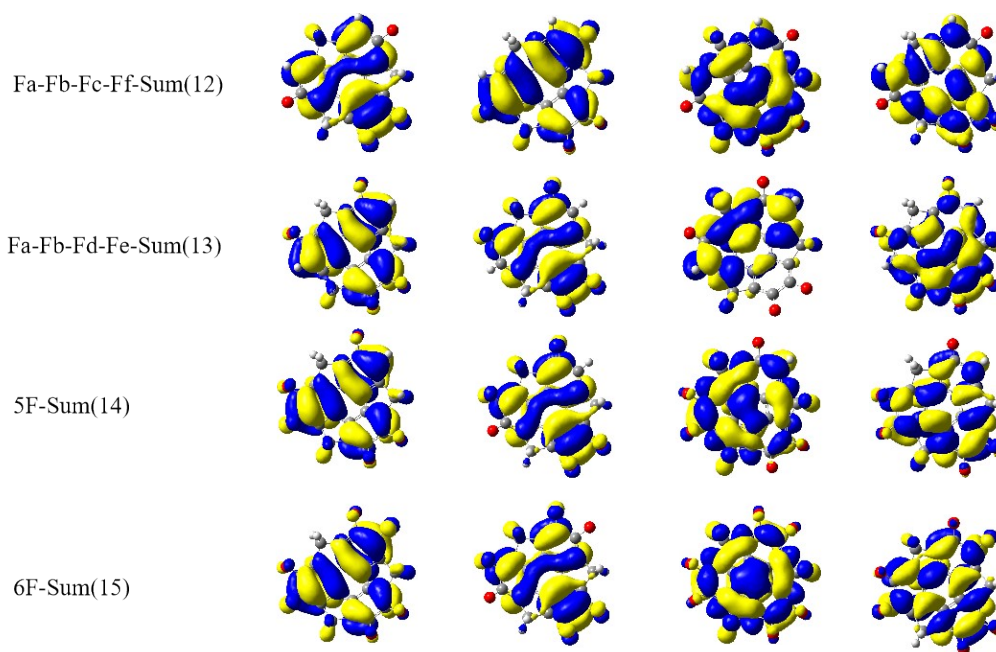

**Figure S4. Molecular orbital plots of sumanene and its aromatic-fluorinated derivatives.**

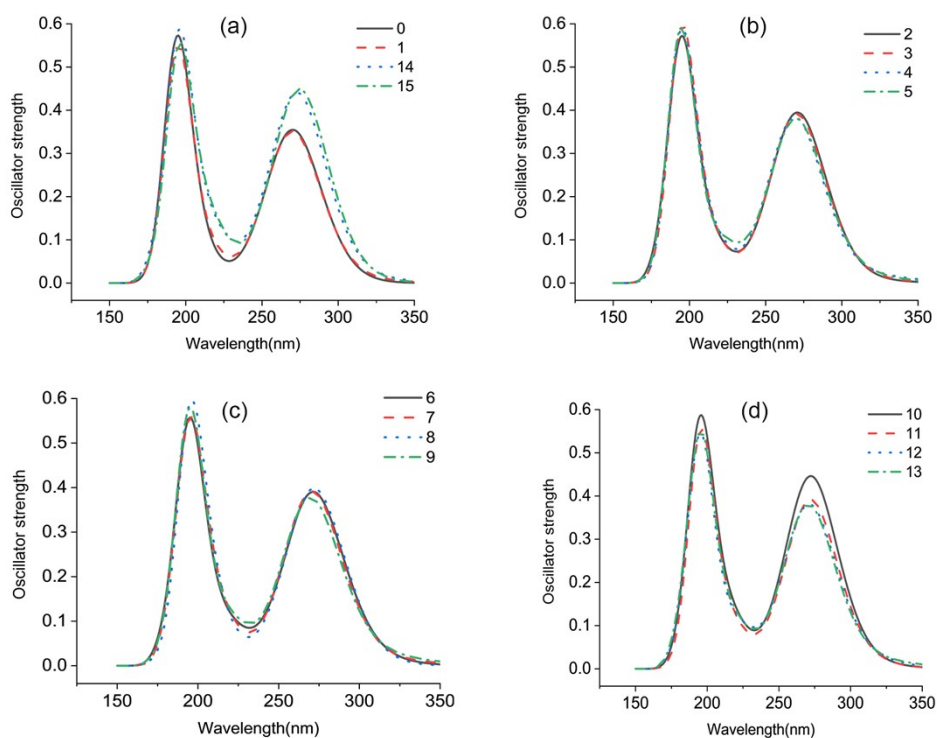

**Figure S5. The absorption spectra of sumanene and its aromatic-fluorinated derivatives by calculation.**
